# Supplementary material for: A Bioinspired Peptide in TIR Protein as Recognition Molecule on Electrochemical Biosensors for the Detection of E. coli O157:H7 in an Aqueous Matrix
Source: MDPI journal article supplement (doi:10.3390/molecules26092559), 2021-04-28
Supplement: s1 [file s1]

## Supplementary information

### **A bioinspired peptide in TIR protein as recognition molecule on electrochemical biosensors for the detection of *E. coli* O157:H7 in aqueous matrices**

J.L. Roperro Vega <sup>1,\*</sup>, J.F. Redondo-Ortega <sup>1,\*</sup>, Y.J. Galvis-Curubo <sup>1</sup>, P. Rondón-Villarreal <sup>2</sup>, J.M. Flórez-Castillo <sup>1</sup>

<sup>1</sup> Universidad de Santander. Facultad de Ciencias Exactas, Naturales y Agropecuarias. Ciencias Básicas y Aplicadas para la Sostenibilidad-CIBAS. Calle 70 No. 55-210, C. P. 680003. Bucaramanga (Santander), Co-lombia; jose.ropero@udes.edu.co

<sup>2</sup> Universidad de Santander. Facultad de Ciencias de la Salud. MASIRA. Grupo de Investigación en Biología Molecular y Biotecnología-BIOMOL. Calle 70 No. 55-210, C. P. 680003. Bucaramanga (Santander), Colombia; diseno.molecular@udes.edu.co

\* Correspondence: jose.ropero@udes.edu.co (J.L. Roperro Vega), jredondo@mail.udes.edu.co (J.H.F. Redon-do Ortega); Tel.: +57 7 6516500 Ext. 1665.

#### **Content**

- 1. Normalized current values for the detection of *E. coli* (500 CFU/mL) obtained from SWV results for the different time and applied potential used in AuNPs electrodeposition.**
- 2. Evaluation of the reduction potential for the electrodeposition of AuNPs on screen-printed electrodes (SPE, Italsens).**
- 3. Negative control for the biosensor.**
- 4. Selectivity of the biosensor towards the detection of *E. coli*.**

**1. Normalized current values for the detection of *E. coli* (500 CFU/mL) obtained from SWV results for the different time and applied potential used in AuNPs electrodeposition.**

**Table S1.** Normalized current values ( $\Delta I_{\text{Normalized}}$ ) obtained from SWV results for the potential and time used in electrodeposition of AuNPs.

| Time of<br>electrodeposition | Potential of electrodeposition |         |         |         |
|------------------------------|--------------------------------|---------|---------|---------|
|                              | +0.05 V                        | -0.05 V | -0.15 V | -0.25 V |
| 20 s                         | 0.210                          | 0.166   | 0.280   | 0.187   |
| 100 s                        | 0.339                          | 0.389   | 0.072   | 0.002   |
| 250 s                        | 0.306                          | 0.561   | -0.015  | 0.302   |

## 2. Evaluation of the reduction potential for the electrodeposition of AuNPs on screen-printed electrodes (SPE, Italsens).

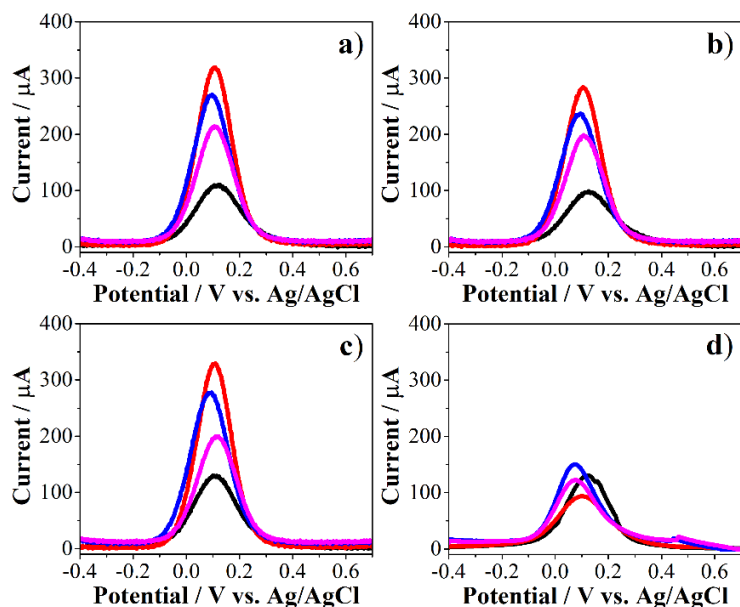

**Figure S1.** Results of SWV of the effect of the applied potential of +0.05 V (a), -0.05 V (b), -0.15 V (c) and -0.25 V (d) in chronoamperometry for AuNPs electrodeposition at a constant time of 20 s. The concentration of PEPTIR-1.0 and *E. coli* was 500 nM and 500 CFU/mL, respectively (concentrations used as reference). The curves correspond to SPE (black lines), SPE/AuNPs (red lines), SPE/AuNPs/PEP (blue lines) and SPE/AuNPs/PEP/EC (rose lines) in all cases. 10 mM  $[\text{Fe}(\text{CN})_6]^{3-}/[\text{Fe}(\text{CN})_6]^{4-}$  in 0.1 M of KCl.

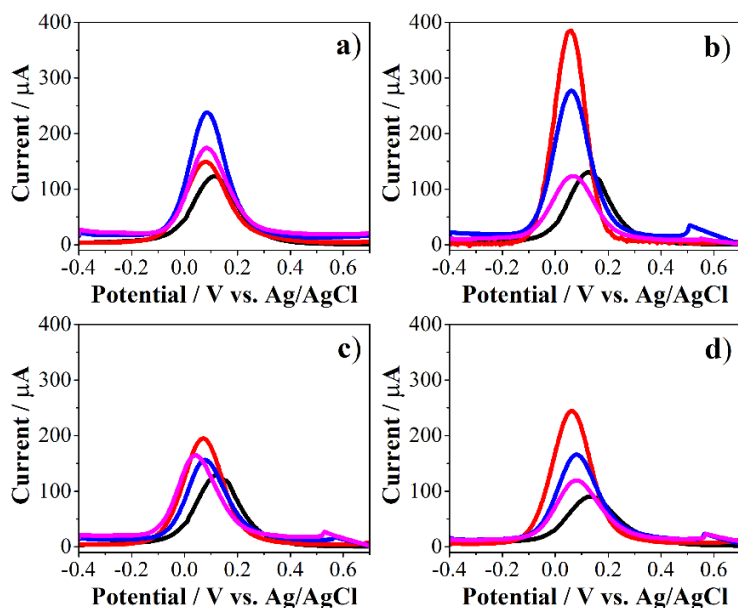

**Figure S2.** Results of SWV of the effect of the applied potential of +0.05 V (a), -0.05 V (b), -0.15 V (c) and -0.25 V (d) in chronoamperometry for AuNPs electrodeposition at a constant time of 250 s. The concentration of PEPTIR-1.0 and *E. coli* was 500 nM and 500 CFU/mL, respectively (concentrations used as reference). The curves correspond to SPE (black lines), SPE/AuNPs (red lines), SPE/AuNPs/PEP (blue lines) and SPE/AuNPs/PEP/EC (rose lines) in all cases. 10 mM  $[\text{Fe}(\text{CN})_6]^{3-}/[\text{Fe}(\text{CN})_6]^{4-}$  in 0.1 M of KCl.

### 3. Negative control for the biosensor.

The negative control of the biosensor consists of a AuNPs-modified screen-printed electrode but without modification with PEPTIR-1.0. The results obtained are shown in Fig. S3.

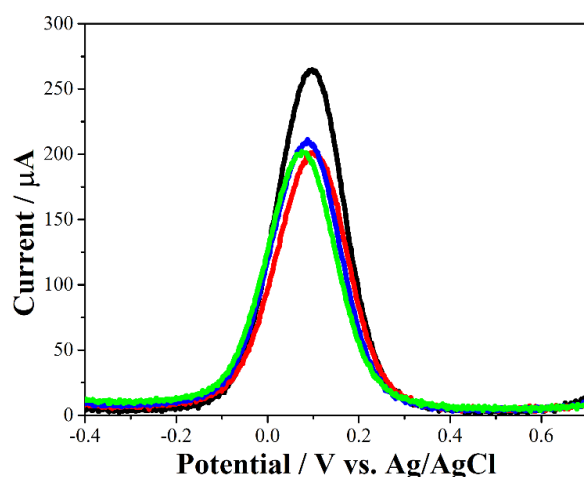

**Figure S3.** Results of SWV for the negative control of the biosensor. The curves correspond to SPE/AuNPs (black), SPE/AuNPs in blank of detection (PBS without *E. coli*, blue), SPE/AuNPs with 10 CFU/mL of *E. coli* (green) and SPE/AuNPs with 1000 CFU/mL of *E. coli* (red). Note that the PBS solution alone produces a change in the biosensor signal. Nevertheless, this signal is not affected by the presence of bacteria in the solution.

#### 4. Selectivity of the biosensor towards the detection of *E. coli*.

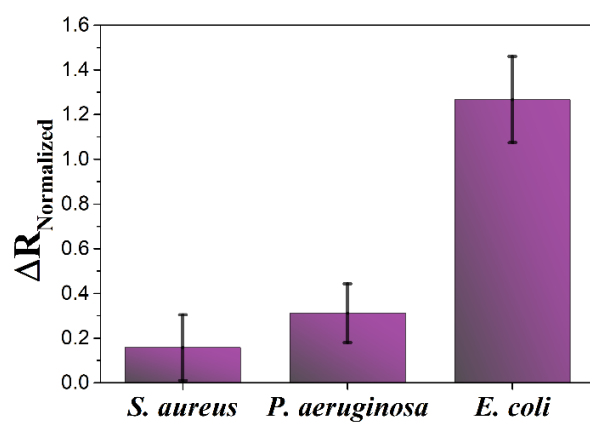

**Figure S4.** Normalized resistance values ( $\Delta R_{\text{Normalized}}$ ) in the evaluation of the selectivity of the biosensor towards the detection of 50 CFU/mL of *E. coli*, *S. aureus* and *P. aeruginosa* bacteria.
